# Supplementary material
Source: PubMed Central journal article supplement (PMC3083763)
Supplement: JCI44900sd.pdf [file JCI44900sd.pdf]

## Supplemental Information

### Sema3E-PlexinD1 signaling selectively suppresses disoriented angiogenesis in ischemic retinopathy in mice

Yoko Fukushima, Mitsuhiro Okada, Hiroshi Kataoka, Masanori Hirashima, Yutaka Yoshida, Fanny Mann, Fumi Gomi, Kohji Nishida, Shin-Ichi Nishikawa, and Akiyoshi Uemura

#### Supplemental Methods

**Cell culture.** To form the concentration gradients of VEGF or Sema3E, HUVECs cultured at a density of  $5 \times 10^3$  cells/cm<sup>2</sup> in gelatin-coated  $\mu$ -Slide VI (Ibidi) were serum-starved with EBM-2 containing 0.5% BSA for 12 hours, and then stimulated with 50 ng/ml human VEGF (HumanZyme) or 500 ng/ml human Sema3E (R&D) according to the manufacturer's protocol. After 30 minutes, cells were fixed, blocked, and stained with Alexa488-phalloidin, anti-RhoJ Ab, and TO-PRO-3.

**Live-cell imaging.** HUVECs cultured on a 0.1% gelatin-coated culture dish (Iwaki) were imaged using an Olympus IX-81 inverted microscope. To monitor the cell shape, a series of time-lapse images were converted into video format using MetaMorph software (Molecular Devices). For monitoring HUVECs ectopically expressing EGFP and RhoJ-WT, images were obtained every 3 minutes 12 hours after the transfection of plasmid vectors. For HUVECs stimulated with Sema3E (500 ng/ml) after 12 hours' serum starvation, images were obtained every 30 seconds. Stealth siRNA was transfected 48 hours prior to the serum starvation. Scale bar: 50  $\mu$ m.

#### Supplemental Movies

- S1** Time-lapse monitoring of merged DIC and fluorescence microscopic images of HUVECs transfected with plasmid vectors expressing RhoJ-WT and EGFP.
- S2** Time-lapse monitoring of serum-starved HUVECs.
- S3** Time-lapse monitoring of Sema3E-stimulated HUVECs after serum starvation.
- S4** Time-lapse monitoring of Sema3E-stimulated HUVECs pretreated by RhoJ siRNA.

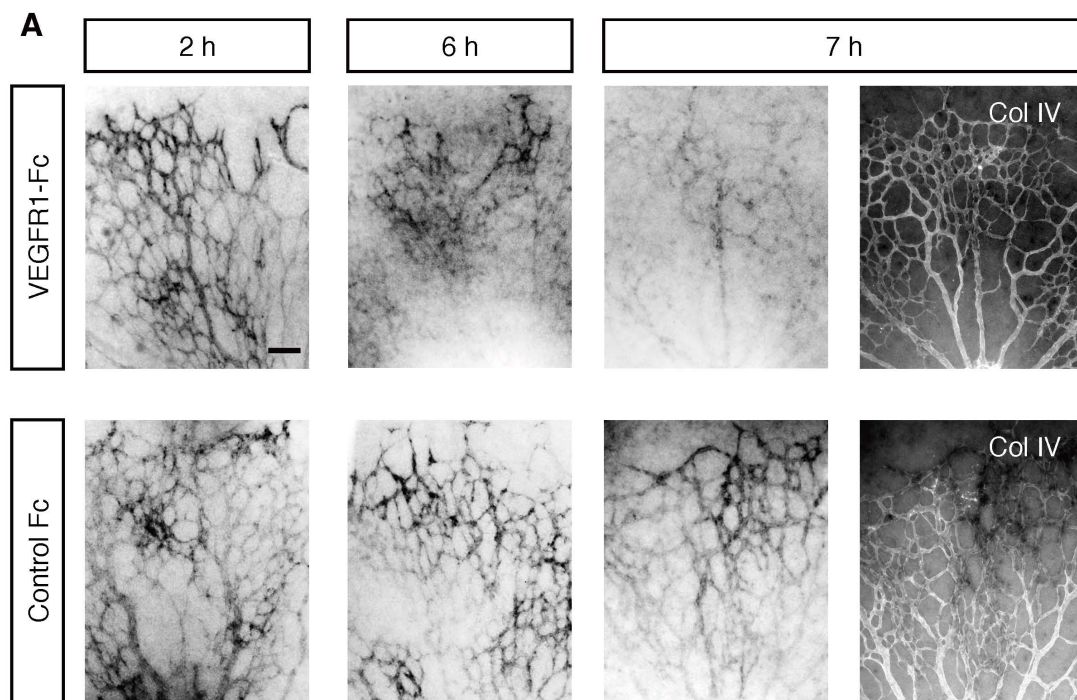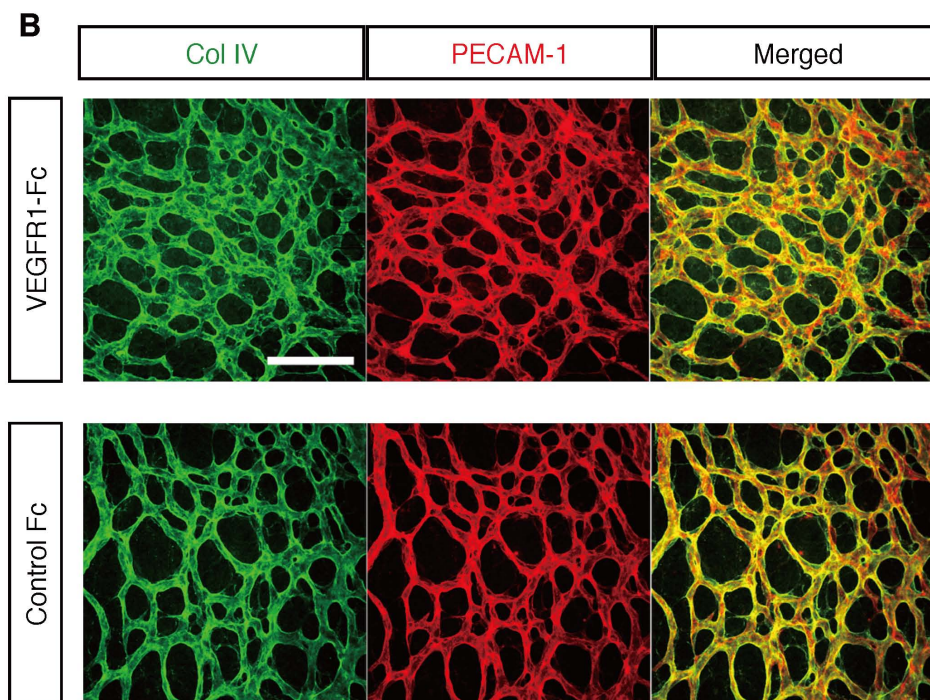

**Supplemental Figure S1**

**Downregulation of endothelial PlexinD1 expression after blocking VEGF signaling.** (A) Whole-mount in situ hybridization (ISH) for *Plxnd1* and immunohistochemistry (IHC) for type IV collagen (Col IV) at 2, 6, and 7 hours after intravitreal protein injection in P4 retinas. After VEGFR1-Fc injection, endothelial *Plxnd1* expression was downregulated at around 7 hours, and became undetectable at 8 hours as demonstrated in Figure 1E. (B) Double IHC for Col IV and PECAM-1 at 8 hours after intravitreal protein injection in P4 retinas. Maintenance of endothelial networks after VEGFR1-Fc injection excludes the possibility that vessel regression is responsible for the *Plxnd1* downregulation. Scale bar: 100  $\mu$ m.

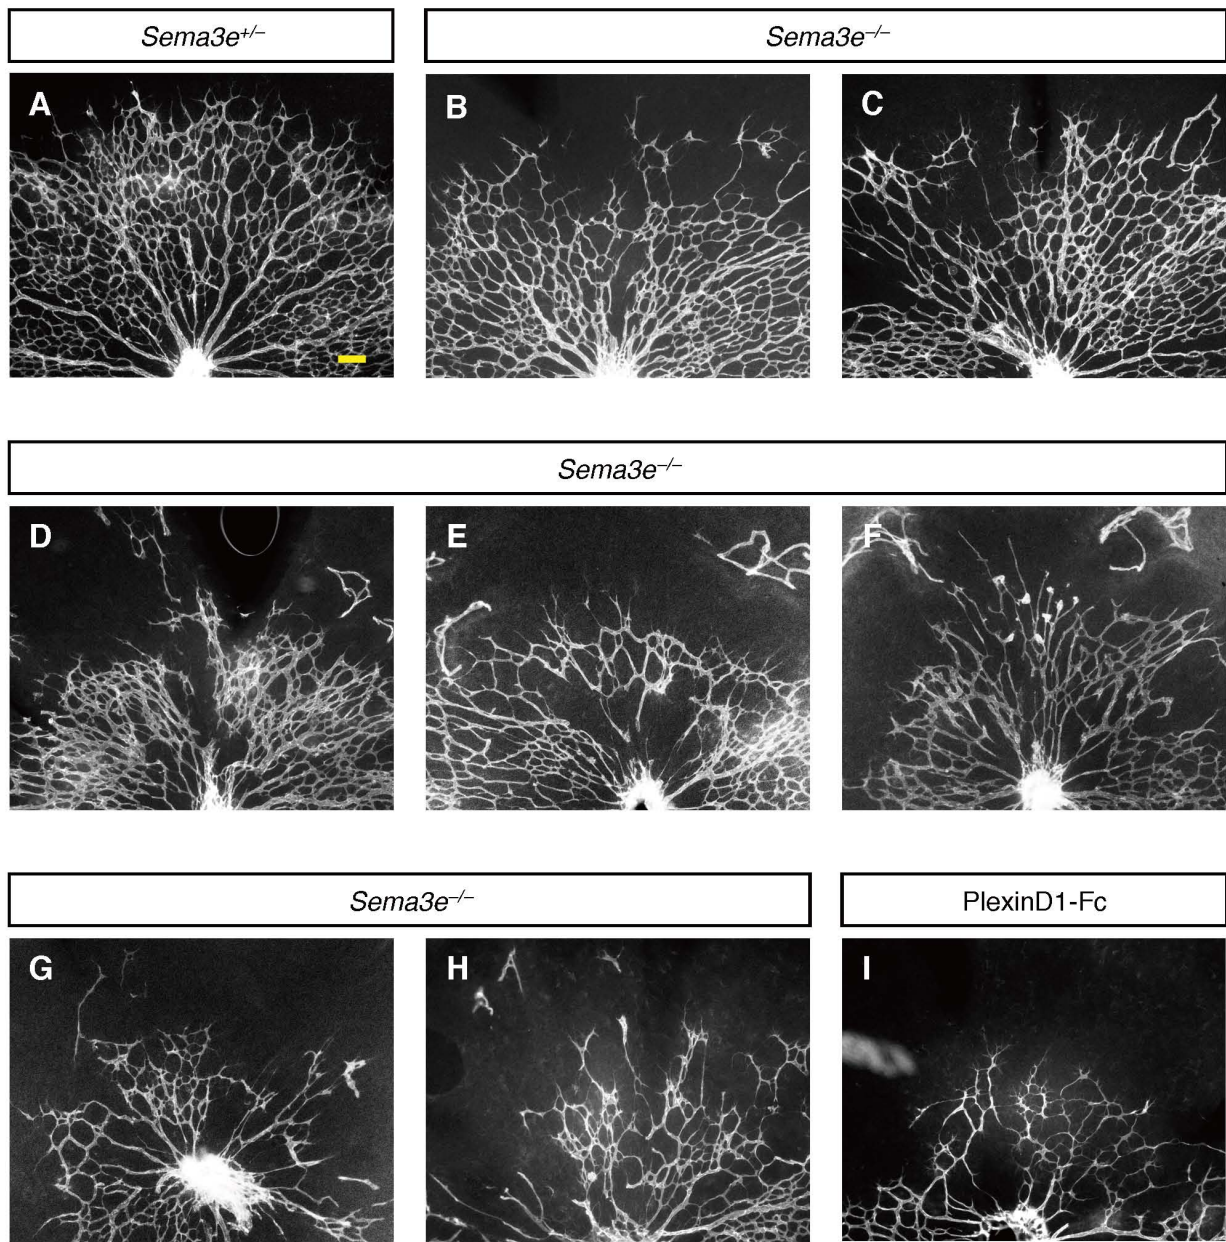

**Supplemental Figure S2**

**Defective vascular development in *Sema3e*-deficient retinas.** (A-I) Whole-mount IHC for PECAM-1 in P4 retinas. *Sema3e*<sup>-/-</sup> retinas display a variety of vascular defects, including solitary clusters of retinal ECs isolated from the advancing vascular fronts (B and C), attachment of hyaloid vessels to the retinal surfaces (C-H), intraretinal vascular tufts (F), and poor development of morphologically distinct arteries and veins (D-H). Note that the disorganized capillary networks in *Sema3e*<sup>-/-</sup> retinas (G and H) are recapitulated by those in P4 retinas injected with PlexinD1-Fc at P1 (I). Scale bar: 100 μm.

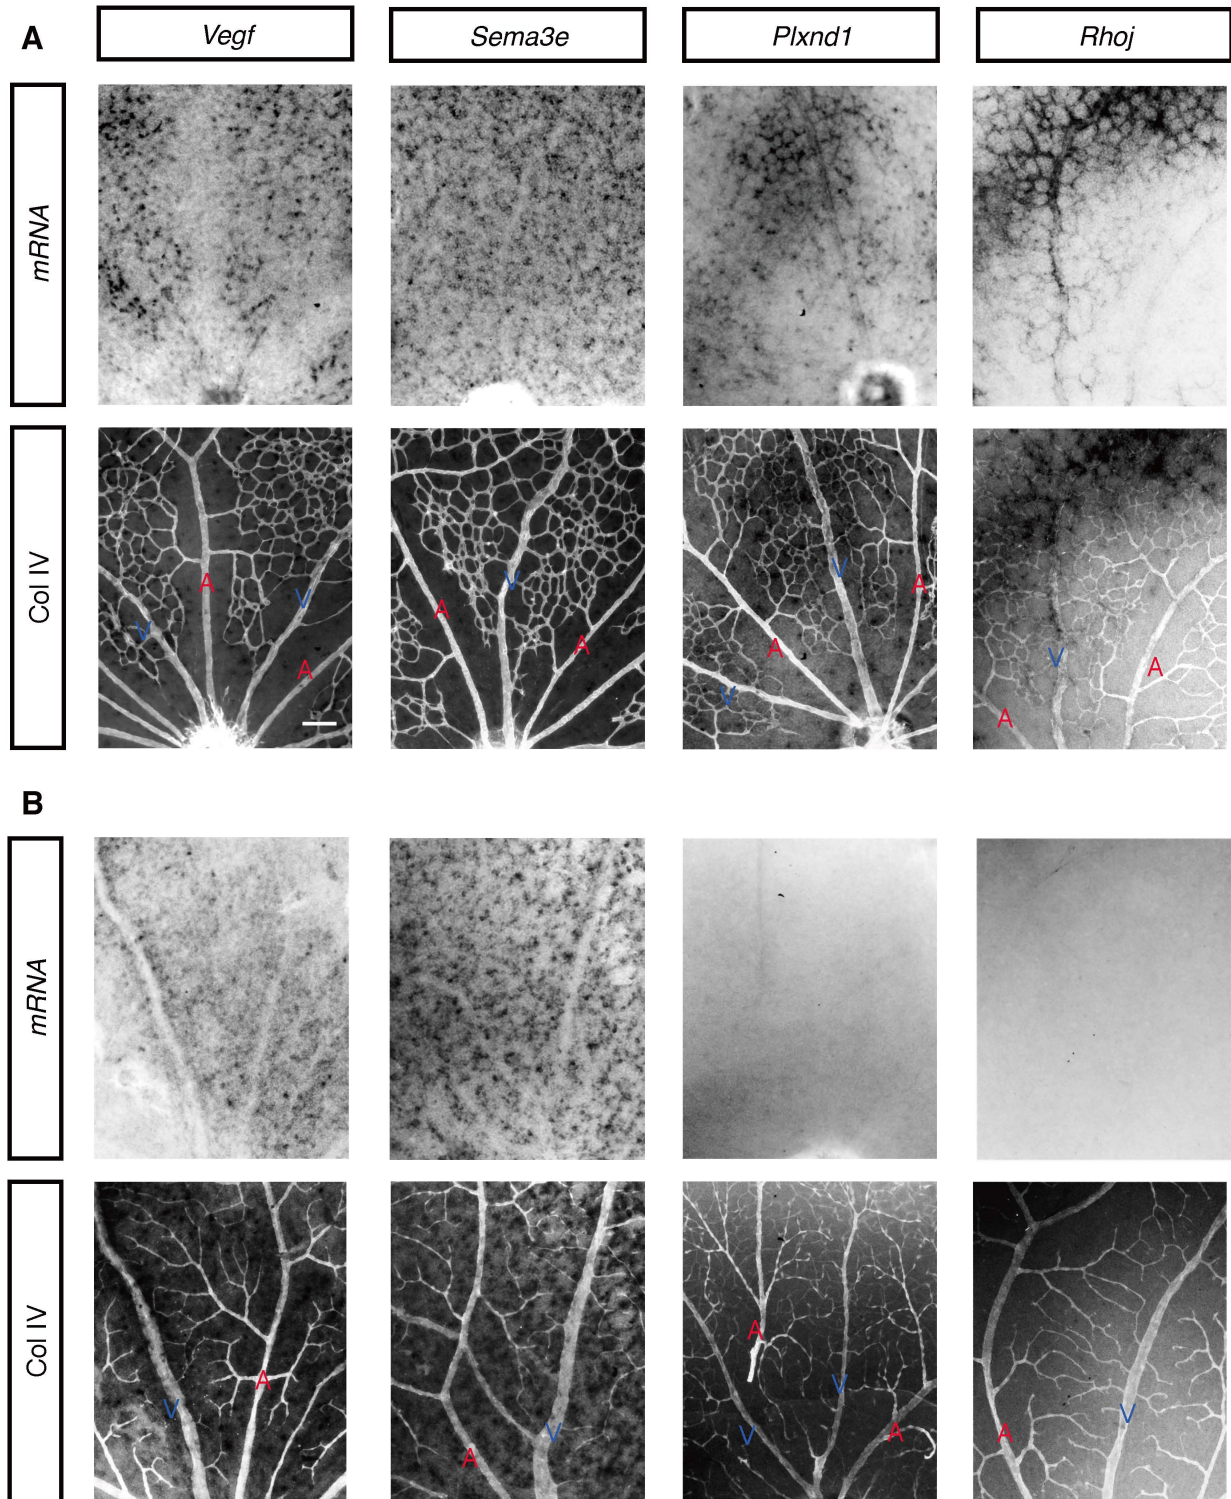

**Supplemental Figure S3**

**Expression of endothelial PlexinD1 and RhoJ at later postnatal stages.** (A and B) Whole-mount ISH in conjunction with IHC for Col IV in P7 (A) and P16 (B) retinas. At P7, endothelial expression of the *Plxnd1* and *Rhoj* genes is maintained in veins and capillaries, whereas their expression is almost undetectable at P16. Note the constitutive *Sema3e* expression in neurons at P16. A, artery; V, vein. Scale bar: 100  $\mu$ m.

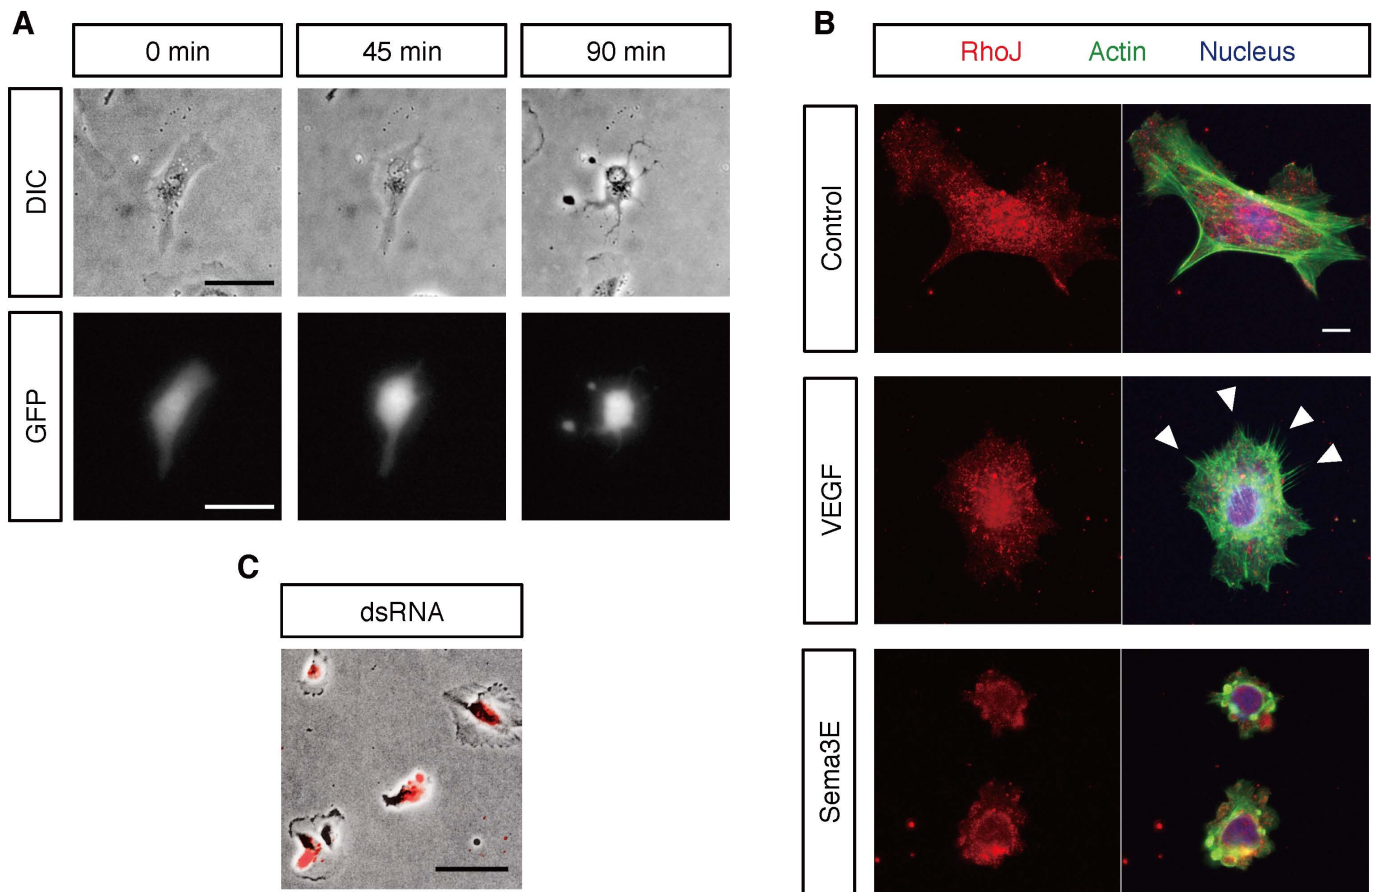

#### Supplemental Figure S4

**RhoJ expression in cultured HUVECs.** (A) Sequential time-lapse images of cell contraction 12 hours after co-transfection of plasmid vectors expressing RhoJ-WT and EGFP. DIC, differential interference contrast microscope. (B) Intracellular localization of RhoJ proteins. By contrast to the cytoplasmic localization in the control and VEGF-stimulated HUVECs, RhoJ proteins are localized in the membrane blebs after Sema3E stimulation. Note the absence of RhoJ proteins in VEGF-induced filopodia (arrowheads) projecting toward the higher VEGF concentration. (C) Merged image of DIC and fluorescence microscopes 24 hours after transfection of BLOCK-iT Alexa Fluor Red Fluorescent Oligo (Invitrogen) in cultured HUVECs. Note the ubiquitous transfection of double-stranded RNA (dsRNA). Scale bar: 50  $\mu\text{m}$  (A); 10  $\mu\text{m}$  (B); 100  $\mu\text{m}$  (C).

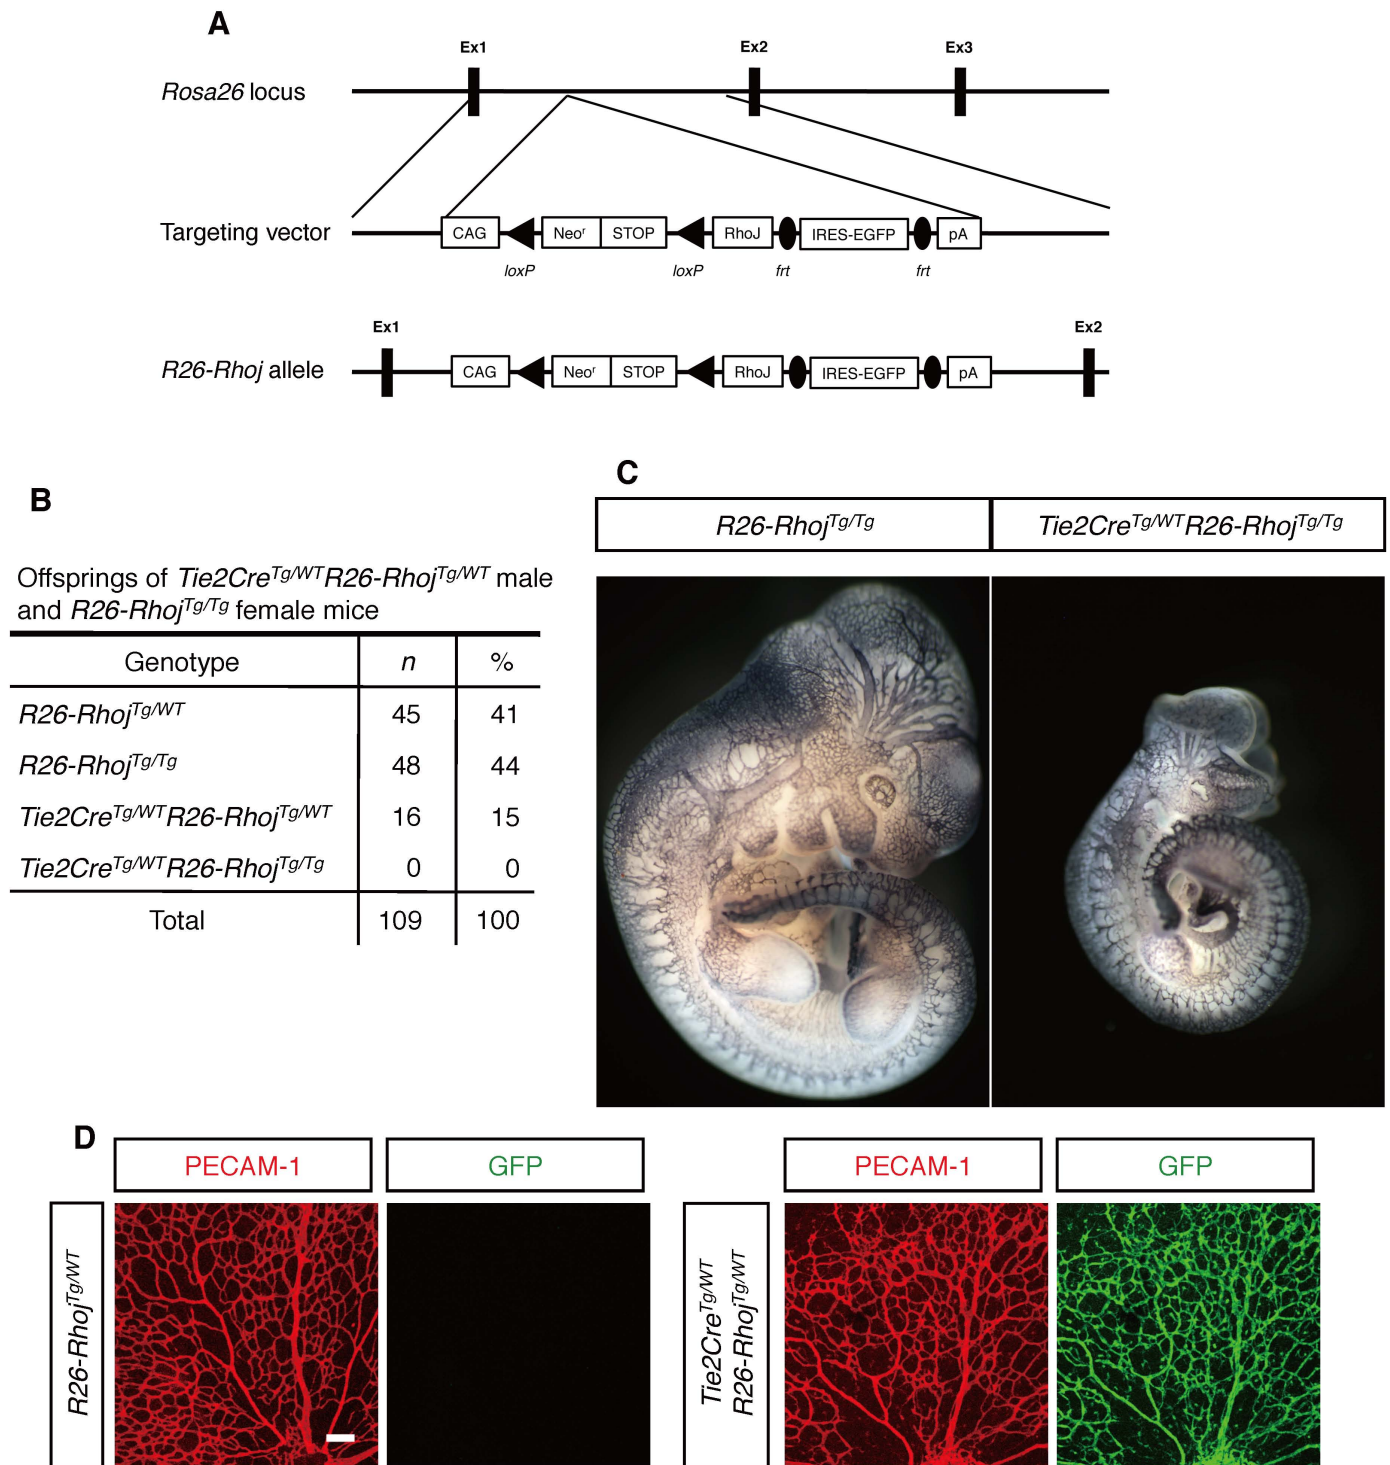

### Supplemental Figure S5

***R26-Rhoj* conditional Tg mouse.** (A) Schematic representation of the targeting strategy for the *R26-Rhoj* allele. RhoJ and EGFP are expressed under control of the CAG promoter after Cre-*loxP*-mediated deletion of the Neo<sup>r</sup>-STOP cassette. (B) Genotypes of newborn pups obtained from mating *Tie2Cre<sup>Tg/WT</sup>R26-Rhoj<sup>Tg/WT</sup>* male with *R26-Rhoj<sup>Tg/Tg</sup>* female mice. Out of 16 *Tie2Cre<sup>Tg/WT</sup>R26-Rhoj<sup>Tg/WT</sup>* newborns, 5 pups (31%) demonstrated general growth retardation. (C) Whole-mount IHC for PECAM-1 in *R26-Rhoj* conditional Tg embryos at 10.5 dpc. (D) Whole-mount IHC for PECAM-1 and GFP in P5 retinas of *R26-Rhoj* mice. GFP is uniformly expressed in ECs of the *Tie2Cre;R26-Rhoj* double Tg mice. Scale bar: 100  $\mu$ m.

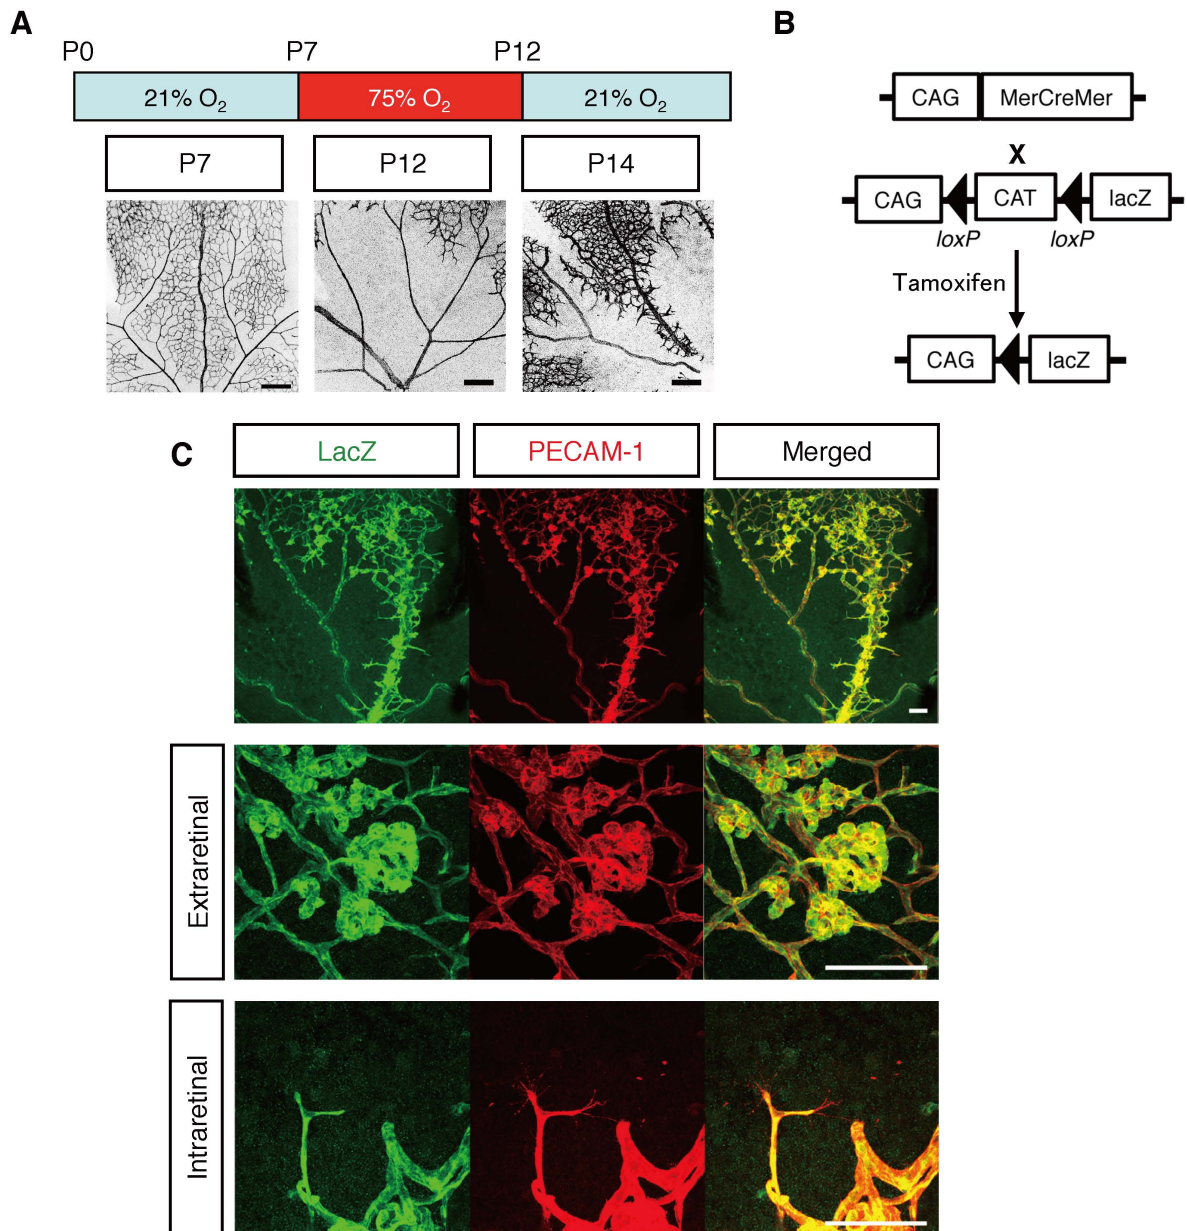

### Supplemental Figure S6

**Tamoxifen-inducible Cre-*loxP*-mediated genetic recombination in the OIR model.** (A) Whole-mount IHC for PECAM-1 illustrating the establishment of the OIR model. Exposure to 75% oxygen from P7 to P12 leads to the regression of preformed retinal capillaries followed by vascular regrowth to the ischemic areas. (B) Representation of the tamoxifen-inducible *loxP* recombination in the *CAG-MerCreMer* Tg mouse bred with the *CAG-CAT-lacZ* Tg mouse (1). MerCreMer contains two mutated estrogen receptor-binding domains, which confers dependency on binding to tamoxifen but not 17 $\beta$ -estradiol for translocation to the nucleus and recombinase activity (2). The *CAG-CAT-lacZ* transgene has a *chloramphenicol acetyltransferase* (CAT) cassette which is flanked by two *loxP* sites, followed by a *lacZ* cassette. The transgenes are under control of the *CAG* promoter; however, *lacZ* is expressed only after Cre-*loxP*-mediated genetic recombination. (C) Whole-mount IHC for *lacZ* (Millipore) and PECAM-1 in P18 OIR retinas of the *CAG-MerCreMer*, *CAG-CAT-lacZ* double Tg mice after daily i.p. injections of 4-hydroxytamoxifen (4OHT) from P12. Note the uniform *loxP* recombination represented by *lacZ* expression in the ECs of the extraretinal and intraretinal vessels. Scale bar: 200  $\mu$ m (A); 100  $\mu$ m (C).

### References

1. Araki K, Araki M, Miyazaki J, Vassalli P. Site-specific recombination of a transgene in fertilized eggs by transient expression of Cre recombinase. *Proc Natl Acad Sci U S A*. 1995;92(1):160-164.
2. Zhang Y, Riesterer C, Ayrall AM, Sablitzky F, Littlewood TD, Reth M. Inducible site-directed recombination in mouse embryonic stem cells. *Nucleic Acids Res*. 1996;24(4):543-548.

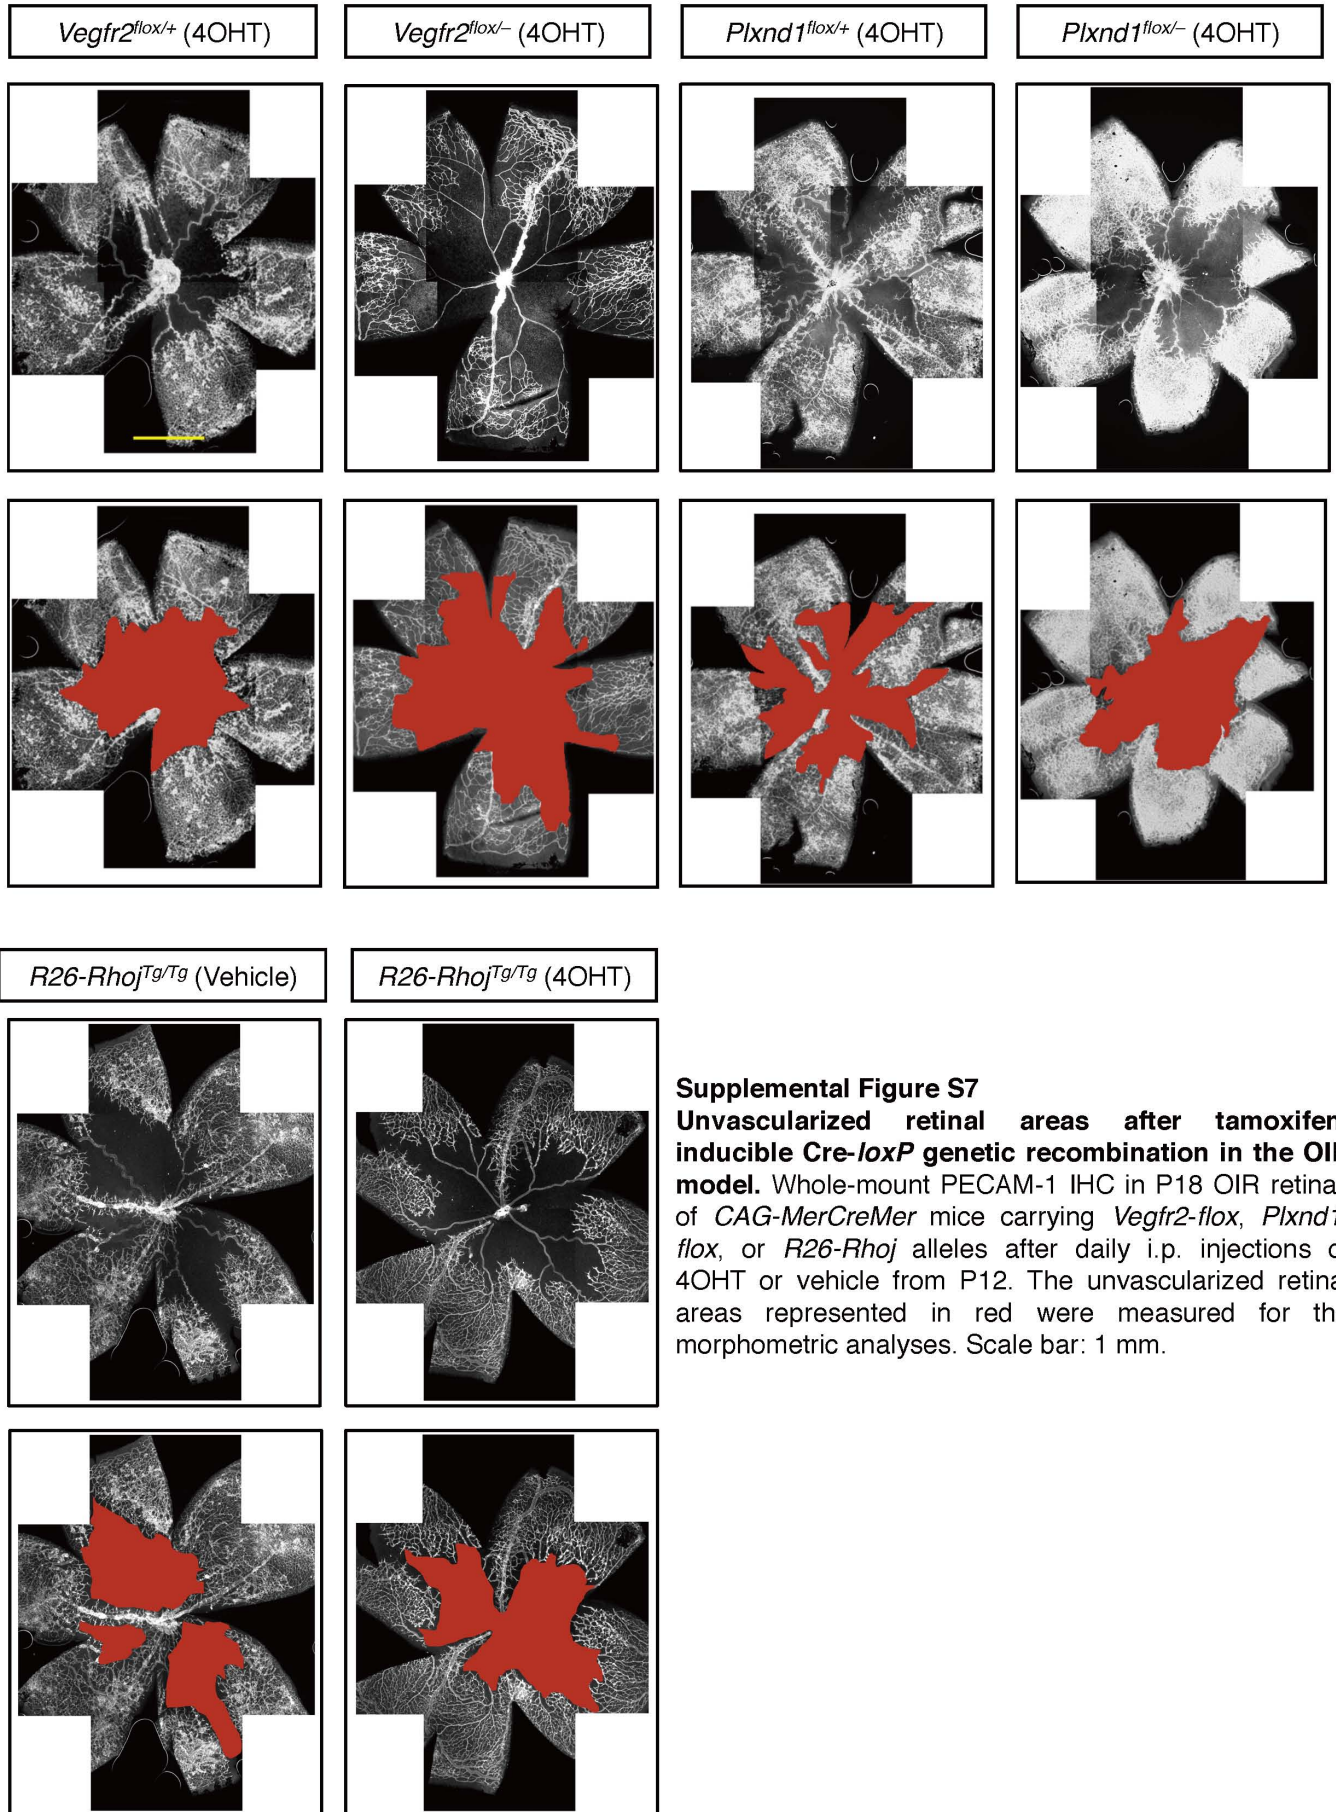

**Supplemental Figure S7**  
**Unvascularized retinal areas after tamoxifen-inducible Cre-loxP genetic recombination in the OIR model.** Whole-mount PECAM-1 IHC in P18 OIR retinas of *CAG-MerCreMer* mice carrying *Vegfr2-flox*, *Plxnd1-flox*, or *R26-Rhoj* alleles after daily i.p. injections of 4OHT or vehicle from P12. The unvascularized retinal areas represented in red were measured for the morphometric analyses. Scale bar: 1 mm.



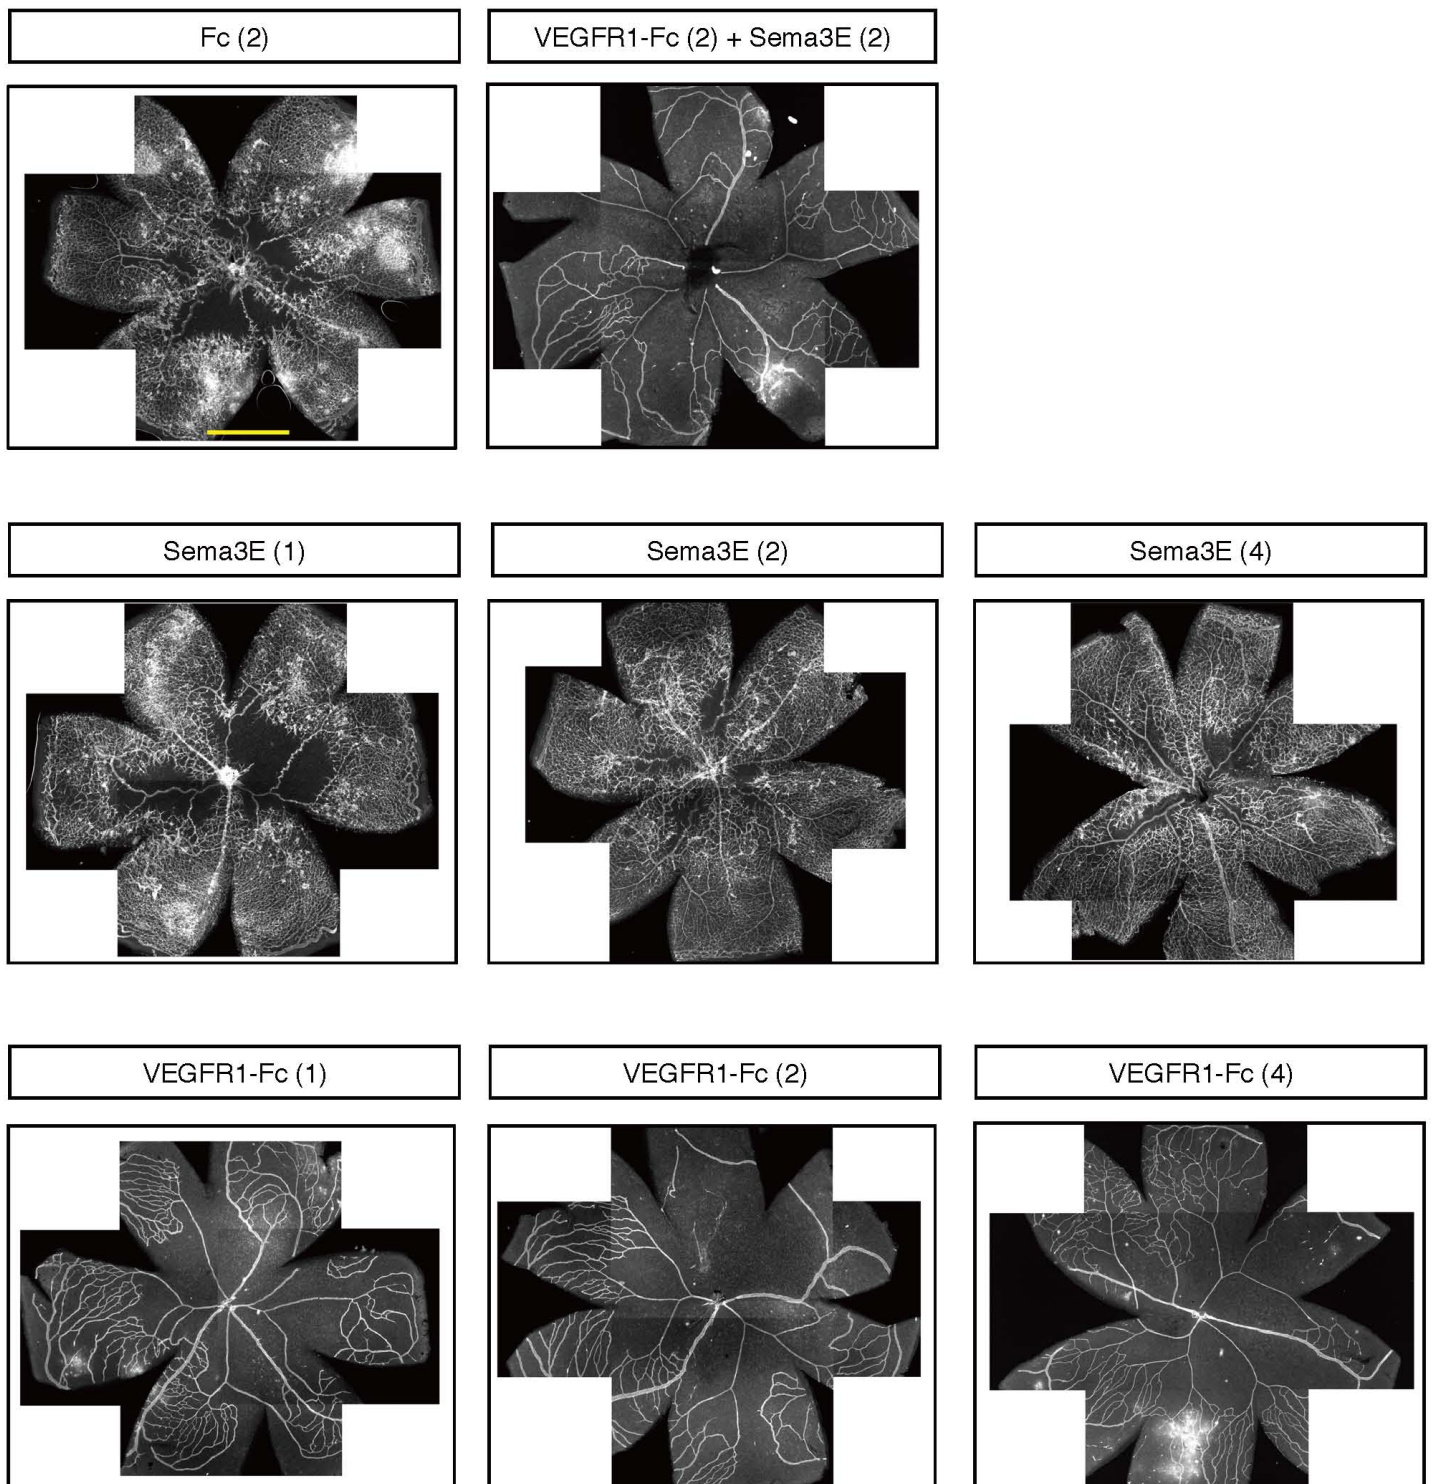

### Supplemental Figure S8

**Effects of intravitreal protein injections in the OIR model.** Panoramic views of whole-mount PECAM-1 IHC in P17 OIR retinas after intravitreal protein injections at P14. The protein concentrations ( $\mu\text{g}/\mu\text{l}$ ) are indicated in the parentheses. In retinas co-injected with VEGFR1-Fc and Sema3E, the vascular phenotypes were identical to those injected with VEGFR1-Fc alone. Scale bar: 1 mm.

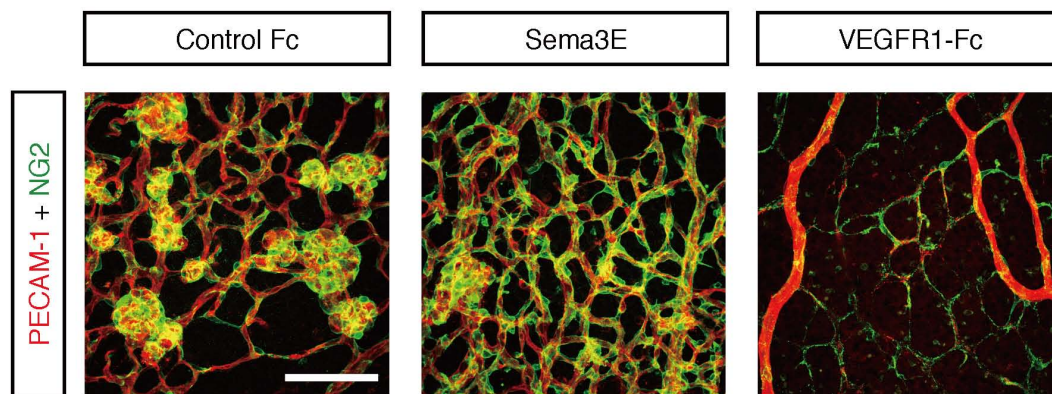

### Supplemental Figure S9

**Pericyte coverage in the OIR model.** Double IHC for PECAM-1 and NG2 in P17 OIR retinas 72 hours after intravitreal injections of 2  $\mu\text{g}/\mu\text{l}$  recombinant proteins. The photographed areas are the same as the lower panels in Figure 7B. After Sema3E injection, most of intraretinal vessels were associated with NG2-expressing periendothelial mural cells. By contrast, after VEGFR1-Fc injection, pericytes formed ghost vessels without PECAM-1-expressing ECs, implying endothelial degeneration. Scale bar: 100  $\mu\text{m}$ .

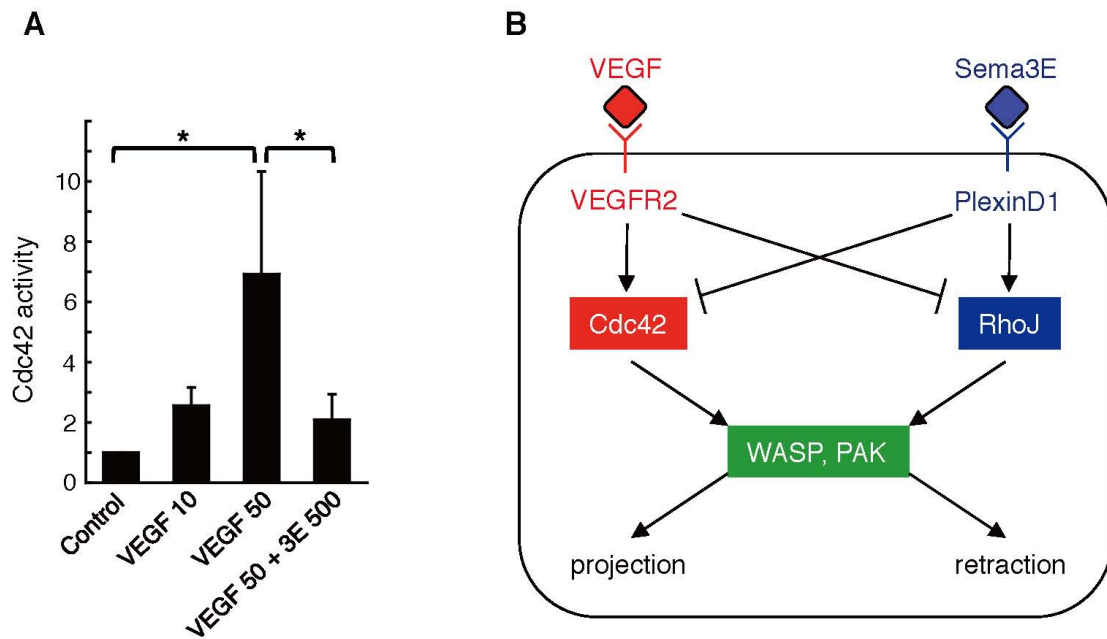

**Supplemental Figure S10**

**Cdc42 and RhoJ as the downstream targets of VEGF and Sema3E signals in endothelial filopodia formation.**

(A) G-LISA Cdc42 activation assay with anti-Cdc42 Ab (Cytoskeleton Inc.). VEGF-induced Cdc42 activation in cultured HUVECs is diminished by exposure to Sema3E. The values 10, 50, 500 indicate the protein concentrations (ng/ml). Error bars represent SEM; \* $P < 0.05$ . (B) Schematic diagram representing the signaling pathways involved in endothelial filopodia formation.

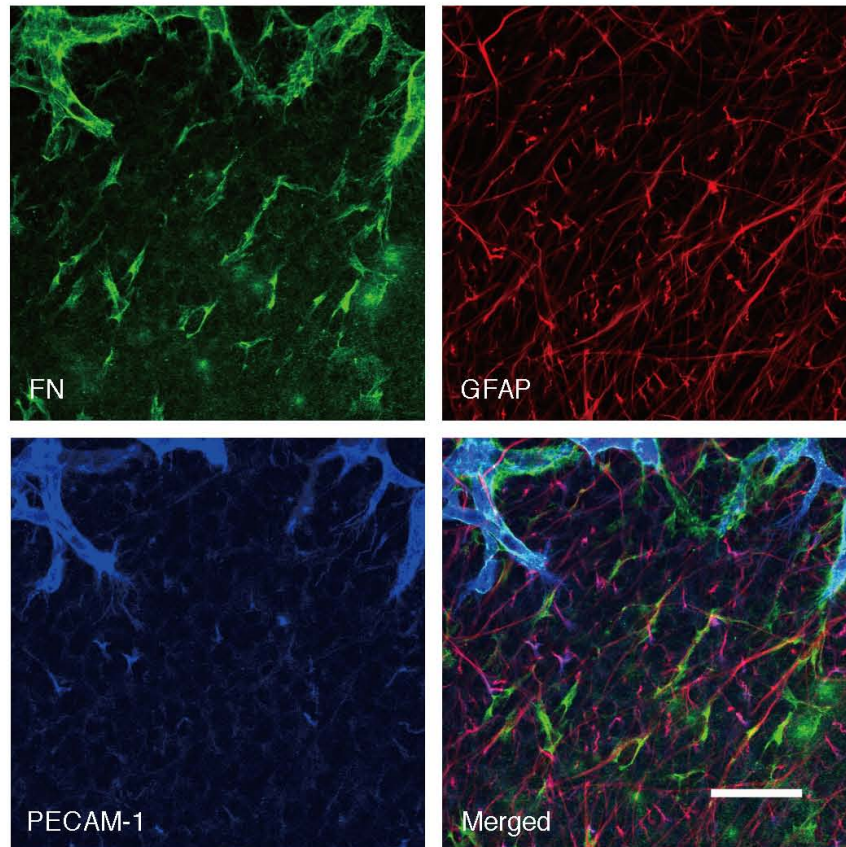

**Supplemental Figure S11**

**Defective extracellular assembly of fibronectin matrices by retinal astrocytes in the OIR model.** Whole-mount IHC for fibronectin (FN, Dako), glial fibrillary acidic protein (GFAP, clone G-A-5, Cy3 conjugated, Sigma), and PECAM-1 in P16 OIR retina. FN proteins are expressed only sporadically in GFAP-expressing astrocytes. Scale bar: 50  $\mu$ m.

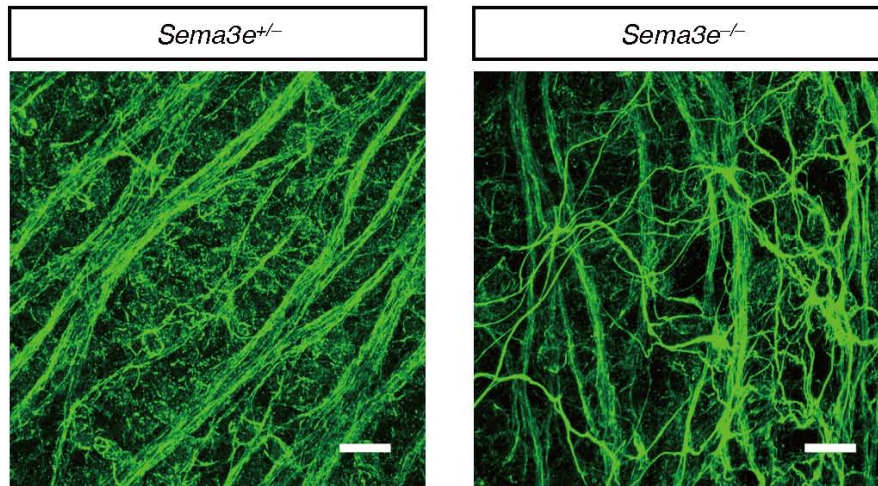

**Supplemental Figure S12**

**Disordered axonal fibers in retinas of *Sema3e*-deficient mice.** Whole-mount IHC for neurofilaments in retinas of P4 *Sema3e*-deficient mice. Note the transverse axonal bundling and/or branching in small areas of the *Sema3e*<sup>-/-</sup> retina compared with the parallel axon alignment in the *Sema3e*<sup>+/-</sup> retina. Scale bar: 20  $\mu$ m
